# Supplementary material
Source: PubMed Central journal article supplement (PMC8128327)
Supplement: JCCA-65-32-S001.pdf [file JCCA-65-32-S001.pdf]

## Appendix 2. *Excluded articles*

### **Original Review (1)**

1. Stuber KJ, Wynd S, Weis CA. Adverse events from spinal manipulation in the pregnant and postpartum periods: a critical review of the literature. *Chiropr Man Therap*. 2012;20:8.

### **Non-clinical (35)**

1. Al-Azdee M, Perle SM, He B. Biased online media coverage: chiropractic and stroke in google news. *Chiropr Man Therap*. 2018;26(1):
2. Alcantara J, Alcantara JD, Alcantara J. The use of validated outcome measures in the chiropractic care of pregnant patients: A systematic review of the literature. *Complement Ther Clin Pract*. 2015;21(2):131-6.
3. Alsaad AM, Fox C, Koren G. Toxicology and teratology of the active ingredients of professional therapy MuscleCare products during pregnancy and lactation: a systematic review. *BMC Complement Altern Med*. 2015;15:40.
4. Akol AD, Weeks AD. Retained placenta: will medical treatment ever be possible? *Acta Obstet Gynecol Scand*. 2016;95(5):501-4.
5. Arora R, Kaiser P, Kastenberger TJ, Schmiedle G, Erhart S, Gabl M. Injectable collagenase clostridium histolyticum as a nonsurgical treatment for Dupuytren's disease. *Oper Orthop Traumatol*. 2016;28(1):30-7.
6. Aspelund A, Tammela T, Antila S, Nrumi H, Leppanene VM, Zarkada G. The Schlemm's canal is a VEGF-C/VEGFR-3-responsive lymphatic-like vessel. *J Clin Invest*, 2-14;124(9):3975-86.
7. Cachinero-Torre A, Diaz-Pulido B, Asunsolo-Del-Barco A. Relationship of the Lateral Rectus Muscle, the Supraorbital Nerve, and Binocular Coordination with Episodic Tension-Type Headaches Frequently Associated with Visual Effort. *Pain Med*. 2017;18(5):969-79.
8. Calmus ML, Macksound EE, Tucker R, Iozzo RV, Lechner BE. A mouse model of spontaneous preterm birth based on the genetic ablation of biglycan and decorin. *Reproduction*. 2011;142(1):183-94.
9. El-Heis S, Crozier SR, Healy E, Robinson SM, Harvey NC, Cooper C, et al. Maternal stress and psychological distress preconception: association with offspring atopic eczema at age 12 months. *Clin Exp Allergy*. 2017;47(6):760-9.
10. Gine C, Arevalo S, Maiz N, Rodo C, Manrique S, Poca A, et al. Fetoscopic two-layer closure of open neural tube defects. *Ultrasound Obstet Gynecol*. 2018;52(4):452-7.
11. Hollis JL, Crozier SR, Inskip HM, Cooper C, Godfrey KM, Harvey NC, et al. Modifiable risk factors of maternal postpartum weight retention: an analysis of their combined impact and potential opportunities for prevention. *Int J Obes (Lond)*. 2017;41(7):1091-8.
12. Hyde NK, Brennan-Olsen SL, Wark JD, Hosking SM, Holloway KL, Pasco JA. Maternal vitamin D and offspring trabecular bone score. *Osteoporos Int*. 2017;28(12):3407-14.
13. Köstlin N, Ostermeir A-L, Spring B, Schwarz J, Marmé A, Walter CB, et al. HLA-G promotes myeloid-derived suppressor cell accumulation and suppressive activity during human pregnancy through engagement of the receptor ILT4. *European Journal Of Immunology*. 2017;47(2):374-84.

14. Köstlin N, Hofstadter K, Ostermeir AL, Spring B, Leiber A, Haen S, et al. Granulocytic Myeloid-Derived Suppressor Cells Accumulate in Human Placenta and Polarize toward a Th2 Phenotype. *J Immunol*. 2016; 196(3):1132-45.
15. Lin SF, Weng HY. Postural headaches due to cerebrospinal fluid leakage through subarachnoid-pleural fistula: A case report. *Headache: The Journal of Head & Face Pain*. 2017;57(3):467-71.
16. McConnel CS, McNeil AA, Hadrich JC, Lombard JE, Garry FB, Heller J. Dairy cow disability weights. *Prev Vet Med*. 2017;143:1-10.
17. McRae MP. Therapeutic benefits of L-arginine: An umbrella review of meta-analyses [systematic review]. *J Chiropr Med*. 2016;15(3):184-9.
18. Pettit J, Glickman-Simon R. Osteopathy and low back pain, acupuncture and in vitro fertilization, Tai Chi and osteoarthritis, andrographis paniculata and ulcerative colitis, and acupressure and vertigo. *Explore*. 2014;10(1):62-6.
19. Robinson SM, Crozier SR, Miles EA, Gale CR, Calder PC, Cooper C, et al. Preconception Maternal Iodine Status Is Positively Associated with IQ but Not with Measures of Executive Function in Childhood. *J Nutr*. 2018;148(6):959-66.
20. Santana EF, Moron AF, Barbosa MM, Milani HJ, Sarmiento SG, Araujo Junior E, et al. Fetal Heart Rate Monitoring during Intrauterine Open Surgery for Myelomeningocele Repair. *Fetal Diagn Ther*. 2016;39(3):172-8.
21. Scheffel J, Regen T, Van Rossum D, Seifert S, Ribes S, Nau R, et al. Toll-like receptor activation reveals developmental reorganization and unmasks responder subsets of microglia. *Glia*. 2012;60(12):1930-43.
22. Stamboulis E, Raptis G, Adrikopoulou A, Arvaniti C, Brountzos E, Oikonomopoulos N, et al. Spontaneous internal carotid artery dissection: an uncommon cause of recurrent postpartum headache. *J Neuroimaging*. 2011;21(1):76-8.
23. Strazielle N, Ghersi-Egea JF. Efflux transporters in blood-brain interfaces of the developing brain. *Front Neurosci*. 2015;9:12.
24. Stone-McCoy P, Abbott G. Resolution of infertility, healthy pregnancy and delivery in a patient previously diagnosed with polycystic ovarian syndrome [PCOS]: A case report and selective review of literature [case report]. *J Pediatr Matern & Fam Health-Chiropr*. 2012; 2012(1):26-30.
25. Su PY, Huang K, Hao JH, Xu YQ, Yan SQ, Li T, et al. Maternal thyroid function in the first twenty weeks of pregnancy and subsequent fetal and infant development: a prospective population-based cohort study in China. *J Clin Endocrinol Metab*. 2011; 96(10):3234-41.
26. Szymanski L, Arnold C, Vaught AJ, LaMantia S, Harris T, Satin AJ. Implementation of a multicenter shoulder dystocia injury prevention program. *Semin Perinatol*. 2017;41(3):187-94.
27. Tahergorabi Z, Khazaei M. A review on angiogenesis and its assays. *Iran J Basic Med Sci*. 2012;15(6):1110-26.
28. Thawani JP, Nayak NR, Pisapia JM, Tahiri Y, Gebbia J, Adzick NS, et al. Myofascial closure of intradural inclusion cysts following in utero myelomeningocele repair. *Pediatr Neurosurg*. 2015;50(5):286-90.
29. Tran KD, Cernichiario-Espinosa LA, Berrocal AM. Management of retinopathy of prematurity. *Asia Pac J Ophthalmol*, 2018;7(1):56-62.

30. Weiniger CF, Spencer PS, Weiss Y, Ginsberg G, Ezra E. Reducing the cesarean delivery rates for breech presentations: administration of spinal anesthesia facilitates manipulation to cephalic presentation, but is it cost saving? *Isr J Health Policy Res*, 2014;3(1):5.
31. Weis CA, Nash J, Triano JJ, Barrett J. Ultrasound assessment of abdominal muscle thickness in women with and without low back pain during pregnancy. *J Manipulative Physiol Ther*. 2017;40(4):230-5.
32. Weis CA, Triano JJ, Barrett J, Campbell MD, Croy M, Roeder J. Ultrasound assessment of abdominal muscle thickness in postpartum vs nulliparous women. *J Manipulative Physiol Ther*. 2015;38(5):352-7.
33. Zaami S, Malvasi A, Marinelli E. Fundal pressure: risk factors in uterine rupture. The issue of liability: complication or malpractice? *J Perinat Med*. 2018;46(5):567-68.
34. Zhao C, Tang R, Wang J, Guan X, Zheng J, Hu J, et al. Six-Step Recanalization Manual Therapy: A Novel Method for Treating Plugged Ducts in Lactating Women. *J Hum Lact*. 2014;30(3):324-30.
35. Sturzenegger K, Schäffer L, Zimmermann R et al. Risk factors of uterine rupture with a special interest to uterine fundal pressure. *J Perinat Med*. 2017;45:309–13.

#### ***Out of study scope (27)***

1. Afshar M. Resolution of transverse breech presentation confirmed by ultrasound following Webster Technique to reduce sublaxation [case report]. *J Pediatr Matern & Fam Health-Chiropr*. 2014;2014(4):760-80.
2. Bayliss AJ, Klene FJ, Gundeck EL, Loghmani MT. Treatment of a patient with postnatal chronic calf pain utilizing instrument-assisted soft tissue mobilization. *J Man Manip Ther*. 2011;19(3): 127-34.
3. Bergström C, Persson M, Mogren I. Sick leave and healthcare utilisation in women reporting pregnancy related low back pain and/or pelvic girdle pain at 14 months postpartum. *Chiropr Man Therap*. 2016;24:7.
4. Cerritelli F, Pizzolorusso G, Renzetti C, Cozzolino V, D’Orazio M, Marinelli B, et al. A multicenter, randomized, controlled trial of osteopathic manipulative treatment on preterms. *PLoS One*. 2015;10(5):e0127370.
5. Chawla JJ, Arora D, Sandhu N, Jain M, Kumari A. Pubic Symphysis Diastasis: A Case Series and Literature Review. *Oman Medical Journal*. 2017;32(6):510-4.
6. Cherry J, Wilson N. Resolution of breech presentation confirmed by ultrasound following Webster Technique: A case study and review of literature [case report]. *J Pediatr Matern & Fam Health-Chiropr*. 2016;2016 (4):104-17.
7. Davis A. Resolution of chronic postpartum urinary incontinence following chiropractic care for vertebral sublaxation [case report]. *J Pediatr Matern & Fam Health - Chiropr*. 2018;2018:Online access only p 49-52.
8. Drobbin D, Zink L. Resolution of breech presentation and successful vaginal birth following the Webster Technique: A case study and selective review of the literature [case report, review]. *J Pediatr Matern & Fam Health - Chiropr*. 2018;2018:Online access only p 138-44.
9. Edwards J, Alcantara J. The care of a pregnant patient with triplets: a chiropractor's experience. *Chiropractic Journal of Australia*. 2017;45(4):324-37.

10. Edwards J, Alcantara J. Chiropractic care of a pregnant patient with a history of migraine headaches, hypothyroidism, and tachycardia [case report]. *J Pediatr Matern & Fam Health-Chiropr.* 2015;2015(1):71-6.
11. Erhardt JW, Windsor BA, Kerry R, Hoekstra C, Powell DW, Porter-Hoke A, et al. The immediate effect of atlanto-axial high velocity thrust techniques on blood flow in the vertebral artery: A randomized controlled trial. *Manual Therapy.* 2015;20(4):614-22.
12. Fano R, Mullin L. Chronic post partum osteitis pubis managed with chiropractic [case report]. *J Pediatr Matern & Fam Health-Chiropr.* 2013;2013(1):15-17.
13. Franke H, Hoesele K. Osteopathic manipulative treatment (OMT) for lower urinary tract symptoms (LUTS) in women. *J Bodyw Mov Ther.* 2013;17(1):11-8.
14. Gibbons PJ, Gray K. Update on clubfoot. *J Paediatr Child Health.* 2013;49(9):E434-7.
15. Herring R, Mullin L. Deep vein thrombosis medically diagnosed as leg pain and sciatica: Diagnostic considerations for the care of the pregnant woman [case report]. *J Pediatr Matern & Fam Health-Chiropr.* 2012; 2012(3):74-6.
16. Hollenbach D, Broker R, Herlehy S, Stuber K. Non-pharmacological interventions for sleep quality and insomnia during pregnancy: A systematic review [review]. *J Can Chiropr Assoc.* 2013;57(3):260-70.
17. Jaskulski JM, Miller JE. Infant demographic profile and parent report of treatment outcomes at a chiropractic clinic in the UK: an observational study. *Journal of Clinical Chiropractic Pediatrics.* 2018;17(1):1398-404.
18. Lavigne V, Gleberzon BJ. Ultrasound as a treatment of mammary blocked duct among 25 postpartum lactating women: a retrospective case series. *J Chiopr Med.* 2012;11(3):170-8.
19. Loree AM, Ondersma SJ, Grekin ER. toward enhancing treatment for pregnant smokers: Laying the groundwork for the use of complementary and alternative medicine approaches. *Nicotine Tob Res.* 2017;19(5):562-71.
20. Malmqvist S, Kjaermann I, Andersen K, Gausel AM, Økland I, Larsen JP, et al. Can a bothersome course of pelvic pain from mid-pregnancy to birth be predicted? A Norwegian prospective longitudinal SMS-Track study. *BMJ Open.* 2018;8(7):e021378-e.
21. Melkersson C, Nasic S, Starzmann K, Bengtsson Boström K. Effect of foot manipulation on pregnancy-related pelvic girdle pain: A feasibility study. *Journal of Chiropractic Medicine.* 2017;16(3):211-9.
22. Pannullo A, Hill A. Physical therapy interventions for prolonged postpartum urinary retention. *Journal of Women's Health Physical Therapy.* 2018;42(1):23-31.
23. Peterson C. A case study of chiropractic management of pregnancy-related heartburn with postulated fetal epigenome implications. *Explore.* 2012;8(5):304-8.
24. Rashid M, Heyns S, Findlay M, Russell D. Reduction in placental insufficiency and normalized fetal growth rate in a pregnant patient following chiropractic care for vertebral subluxation: A case report [case report]. *J Pediatr Matern & Fam Health - Chiropr.* 2017;2017(4):Online access only p 178-84.
25. Roecker CB. Breech repositioning unresponsive to Webster technique: coexistence of oligohydramnios. *J Chiopr Med.* 2013;12(2):74-8.
26. Rosenbaum TY. Physical therapy treatment of persistent genital arousal disorder during pregnancy: a case report. *J Sex Med.* 2010;7(3):1306-10.

27. Smith CA, Levett KM, Collins CT, Dahlen HG, Ee CC, Sukanuma M. Massage, reflexology and other manual methods for pain management in labour. *Cochrane Database Syst Rev.* 2018;3:

### **Narrative/letter (18)**

1. Bagagiolo D, Didio A, Sbarbaro M, Giuseppe Priolo C, Borro T, Farina D. Osteopathic manipulative treatment in pediatric and neonatal patients and disorders: Clinical considerations and updated review of the existing literature. *American Journal of Perinatology.* 2016;33(11):1050-4.
2. Bharrdwaj A, Nagandla K. Musculoskeletal symptoms and orthopaedic complications in pregnancy: Pathophysiology, diagnostic approaches and modern management. *Postgrad Med J.* 2014;90(1066):450-60.
3. Cohen SR, Thomas CR. Rebozo technique for fetal malposition in labor. *J Midwifery Womens Health.* 2015;60(4):445-51.
4. Dampc B, Słowiński K. Cocygodynia - pathogenesis, diagnostics and therapy. Review of the writing. *Polski Przegląd Chirurgicalny.* 2017;89(4):33-40.
5. Din MZ, James S. Is osteopathic manipulative treatment effective for low back pain management in pregnancy? *Evidence-Based Practice.* 2017;20(1):5-.
6. Fishburn S. Pelvic girdle pain: The Stickmum project 3 years forward. *British Journal of Midwifery.* 2018;26(11):708-13.
7. Gross GA, George JW. Orthopedic injury in pregnancy. *Clin Obstet Gynecol,* 2016;59(3):629-38.
8. Harvey, K. A critical appraisal of evidence and arguments used by Australian chiropractors to promote therapeutic interventions. *Chiropr J Australia.* 2016;44:234-45.
9. Johnson C. Back to back: postnatal osteopathic care. *Pract Midwife.* 2013;16(5):26-7.
10. Kline CM, Nelson L, Aspegren D, Heller M, Forcum T. The deceptively complex rib cage, part I. *JACA Online.* 2010;47(2):p2-5.
11. Oswald C, Higgins CC, Assimakopoulos D. Optimizing pain relief during pregnancy using manual therapy. *Can Fam Physician.* 2013;59(8):841-2.
12. Riva JJ, Krawchenko IE, Lam JM, Stanford EC. Consider your local drug information pharmacist...Chiropractors and pharmacists in a family health team: unlikely allies in the collaborative management of pregnancy-related back pain. *Can Pharm J.* 2011;144 (2):62-5
13. Sharshiner R, Silver RM. Management of fetal malpresentation. *Clin Obstet Gynecol.* 2015;58(2):246-55.
14. Smith CA, Armour M, Ee C. Complementary therapies and medicines and reproductive medicine. *Semin Reprod Med.* 2016;34(2):67-73.
15. Smith DL, Pohlman KA, Cramer GD. Chiropractors respond. *Can Fam Physician.* 2013;59(12):1265, 1267-8
16. Sipko T, Grygier D, Barczyk K, Eliaz G. The occurrence of strain symptoms in the lumbosacral region and pelvis during pregnancy and after childbirth. *J Manipulative Physiol Ther.* 2010;33(5):370-7.
17. Walker KF, Dritsaki M, Bugg G, Macpherson M, McCormick C, Grace N, et al. Labour induction near term for women aged 35 or over: an economic evaluation. *BJOG.* 2017;124(6):929-34.

18. Zito PM, Abbasi OZ. Osteopathic manipulative treatments for common pain issues encountered in pregnancy. *International Journal of Childbirth Education*. 2013;28(2):76-78.

### ***Non-chiropractic (17)***

1. Clements KM, Mitra M, Zhang J, Iezzoni L. Pregnancy characteristics and outcomes among women at risk for disability from health conditions identified in medical claims. *Womens Health Issue*. 2016;26(5):504-10.
2. Dietz HP, Franco AV, Shek KL, Kirby A. Avulsion injury and levator hiatal ballooning: two independent risk factors for prolapse? An observational study. *Acta Obstet Gynecol Scand*. 2012;91(2):211-4.
3. Dionsi B, Senatori R. Effect of transcutaneous electrical nerve stimulation on the postpartum dyspareunia treatment. *J Obstet Gynaecol Res*, 2011;37(7):750-3.
4. Farhangniya M, Rabori ED, Kermani RM, Haghdoost AA, Bahrapour A, Bagheri P, et al. Comparison of congenital abnormalities of infants conceived by assisted reproductive techniques versus infants with natural conception in Tehran. *Int J Fertil Steril*. 2013;7(3):217-24.
5. Jarrel J, Malekzadeh L, Yang H, Arendt-Nielsen. The significance of cutaneous allodynia in a woman with chronic pelvic pain. *J Obstet Gynaecol Can*. 2015;37(7):628-32.
6. Kessler C, Stapefeldt E, Michalsen A, Kowalcek I, Kronpab L, Dhruva A. The effect of a complex multi-modality ayurvedic treatment in a case of unknown female infertility. *Forsch Komplementmed*. 2015;22(4):251-8.
7. Landy SH. 'Best of the Rest': Published headache research 2010-2011. *Headache*. 2012;52(s1):45-49.
8. Leung TY, Stuart O, Suen SS, Sahota DS, Lau TK, Lao TT. Comparison of perinatal outcomes of shoulder dystocia alleviated by different type and sequence of manoeuvres: A retrospective review. *BJOC*. 2011;118(8):985-90.
9. Ling N, Lawson E, von Scheven E. Adverse pregnancy outcomes in adolescents and young women with systemic lupus erythematosus: a national estimate. *Pediatr Rheumatol Online J*. 2018;16(1):26.
10. Monaghan C, Haywood A. Pelvic girdle pain - part 1: quantitative results from a mixed-methods service evaluation introducing a manual therapy treatment approach to usual care. *Journal of Pelvic, Obstetric & Gynaecological Physiotherapy*. 2016(119):47-55.
11. Pilliod RA, Caughey AB. Fetal malposition: impact and management. *Obstet Gynecol Clin North Am*. 2017; 44(4):631-643.
12. Rice AD, Patterson K, Wakefield LB, Reed ED, Breder KP, Wurn BF, et al. Ten-year retrospective study on the efficacy of a manual physical therapy to treat female infertility. *Altern Ther Health Med*. 2015;21(3):36-44.
13. Riis A, Hartvigsen J, Rathleff MS, Afzali T, Jensen MB. Comparing satisfaction with a participatory driven web-application and a standard website for patients with low back pain: a study protocol for a randomised controlled trial (part of the ADVIN Back Trial). *Trials*. 2018;19(1):399-.
14. Russo G, Remonato A, Remonato R, Zanier E. Hypnosis and osteopathic manipulative treatment for visual disorders during pregnancy: A case report. *Adv Mind Body Med*. 2017;31(3):23-7.

15. Schlegel ML, Whalen JL, Williamsen PM. Integrative therapies for women with a high risk pregnancy during antepartum hospitalization. *MCN Am J Matern Child Nurs.* 2016;41(6):356-62.
16. Storheim K. Targeted physiotherapy treatment for low back pain based on clinical risk can improve clinical and economic outcomes when compared with current best practice. *J Physiother.* 2012;58(1):57.
17. Vixner L, Schytt E, Stener-Victorin E, Waldenstrom U, Peetersson H, Martensson LB. Acupuncture with manual and electrical stimulation for labour pain: A longitudinal randomised controlled trial. *BMC Complement Altern Med.* 2014;14:187.

### ***Non pregnant/postpartum (12)***

1. Barber M, Chalifour DS, Anderson MR. Uterine perforation and migration of an intrauterine contraceptive device in a 24-year-old patient seeking care for abdominal pain. *J Chiropr Med.* 2011;10(2):126-9.
2. Budgell B, Yee B. A scoping review of chiropractic management of female patients with infertility. *J Can Chiropr Assoc.* 2018;62(2):117-24.
3. Cui JZ, Geng ZS, Zhang YH, Feng JY, Zhu P, Zhang XB. Effects of intracutaneous injections of sterile water in patients with acute low back pain: a randomized, controlled, clinical trial. *Braz J Med Biol Res.* 2016;49(3):e5092.
4. El-Heis S, Crozier SR, Healy E, Robinson SM, Harvey NC, Cooper C. Maternal stress and psychological distress preconception: association with offspring atopic eczema at age 12 months. *Clin Exp Allergy.* 2017;47(6):760-9.
5. Franke H, Franke JD, Fryer G. Osteopathic manipulative treatment for nonspecific low back pain: a systematic review and meta-analysis. *BMC Musculoskelet Disord.* 2014;15:286.
6. Fysh PN. Benign joint hypermobility -- developing clinical significance. *J Clin Chiropr Pediatr.* 2018;17(2):1431-40.
7. Hensel KL, Pacchia CF, Smith ML. Acute improvement in hemodynamic control after osteopathic manipulative treatment in the third trimester of pregnancy. *Complement Ther Med.* 2013;21(6):618-26.
8. Ireland A, Saunders FR, Muthuri SG, Pavlova AV, Hardy RJ, Martin KR, et al. Age at onset of walking in infancy is associated with hip shape in early old age. *J Bone Miner Res.* 2019;34(3):455-63.
9. O'Shea FD, Boyle E, Salonen DC, Ammendolia C, Peterson C, Hsu, et al. Inflammatory and degenerative sacroiliac joint disease in a primary back pain cohort. *Arthritis Care Res.* 2010;62(4):447-54.
10. Pande K, Aung TT, Leong JF, Bickle fl. Transient osteoporosis of the hip: A case report. *Malays Orthop J.* 2017. 11(1):77-8.
11. Elmadag M, Ceylan HH, Erdil M, Imren Y, Bilsel K, Tuncay I. Case Report. Congenital Dislocation of Knee. *Eur J Gen Med.* 2013;10(3):164-6.
12. Ricco M, Signorelli C. Personal and occupational risk factors for carpal tunnel syndrome in meat processing industry workers in Northern Italy. *Med Pr.* 2017;68(2):199-209.

### ***Survey (10)***

1. Alcantara J, Nazarenko AL, Ohm J, Alcantara J. The use of the patient reported outcomes measurement information system and the Rand VSQ9 to measure the quality of life and

- visit-specific satisfaction of pregnant patients under chiropractic care utilizing the webster technique. *J Altern Comp Med.* 2018;24(1):90-8.M
2. Alacantra J, Ohm J, Kunz K, Alacantra JD. The characterisation and response to care of pregnant patients receiving chiropractic care within a practice-based research network. *Chiropr J of Austr* 2012;42(2):60-67.
  3. Duray SM, Mekow CL. Pregnant students in the gross anatomy laboratory: policies and practices at chiropractic colleges. *Anat Sci Educ.* 2011;4(1):22-8.
  4. Enochs HK, Savage C, Slaven EJ. Comparing the management of postpartum patients by physical therapists with orthopedic or women's health clinical specializations. *Journal of Women's Health Physical Therapy.* 2018;42(1):42-3.
  5. Mullin L, Alcantara J, Barton D, Dever L. Attitudes and views on chiropractic: A survey of United States midwives. *Complement Ther Clin Pract.* 2011;17(3):135-40.
  6. Robbins MS, Kuruvilla D, Blumenfeld A, Charleston L, Sorrell M, Robertson CW. Trigger point injections for headache disorders: expert consensus methodology and narrative review. *Headache.* 2014; 54(9):1441-59.
  7. Steel A, Adams J, Sibbritt D, Broom A, Frawely J, Gallois C. Relationship between complementary and alternative medicine use and incidence of adverse birth outcomes: an examination of a nationally representative sample of 1835 Australian women. *Midwifery.* 2014;30(12):1157-65.
  8. Sadr S, Pourkiani-Allah-Abad N, Stuber KJ. The treatment experience of patients with low back pain during pregnancy and their chiropractors: a qualitative study. *Chiropr Man Therap.* 2012;20(1):32.
  9. Simões L, Teixeira-Salmela LF, Magalhães L, Stuge B, Laurentino G, Wanderley E, et al. Analysis of test-retest reliability, construct validity, and internal consistency of the Brazilian version of the Pelvic Girdle Questionnaire. *J Manipulative Physiol Ther.* 2018;41(5):425-33.
  10. Weis CA, Stuber K, Barrett J, Greco A, Kipershlak A, Glenn T. Attitudes toward chiropractic: A survey of Canadian obstetricians. *J Evid Based Complementary Altern Med.* 2016;21(2):92-104.

#### ***Adverse events not reported (8)***

1. Dashtkian H, Whittle-Davis H. Resolution of breech presentation following application of Webster Technique: A case report [case report]. *J Pediatr Matern & Fam Health-Chiropr.* 2011;2011(2):40-42.
2. Edwards J, Alcantara J. Chiropractic care of a pregnant patient presenting with pseudotumor of the cerebrum, neck pain, migraine and vertebral subluxation [case report]. *J Pediatr Matern & Fam Health-Chiropr.* 2015;2015(3):108-11.
3. Gregory K, Rowell R. Chiropractic care for postpartum pelvic girdle pain and low back pain: A case report. *J Clin Chiropr Pediatr.* 2011;12(2):910-14.
4. Henry L. Chiropractic management of postpartum pubic symphysis diastasis: A case report [case report]. *J Can Chiropr Assoc.* 2015;59(1):30-6.
5. Howell ER. Pregnancy-related symphysis pubis dysfunction management and postpartum rehabilitation: two case reports. *J Can Chiropr Assoc.* 2012;56(2):102-11.
6. Phillips CJ. Musculoskeletal and radicular pain during pregnancy, labor, and delivery: The concurrent use of spinal manipulative therapy (SMT), craniosacral therapy (CST),

and dynamic body balancing techniques (DBB): Five case reports [case report]. *J Clin Chiropr Pediatr*. 2010;11(2):797-803.

7. Renard JA, Abraham-Justice K. Manual therapy and core stabilization exercises with postpartum pelvic girdle pain and meralgia paresthetica: A case report. *Journal of Women's Health Physical Therapy*. 2012;36(1):35-43.
8. Rubin D, Smyrna GA. Resolution of breech presentation using an Activator adjusting instrument to administer Webster's Technique in three women undergoing chiropractic care [case report]. *J Pediatr Matern & Fam Health-Chiropr*. 2010;2010(1):18-21.

### ***Foreign (3)***

1. Arroniz Perosanz M, Lete Lasa I. Toxoplasmosis and pregnancy. *Aten Primaria*. 1992; 10(5):795-8.
2. Figurelli J, Bresson L, De Gasquet B, Bigot J, Langlois S, Depret S, et al. Anterior dislocation of a Incarcerated Retroverted Uterus at 21 weeks of amenorrhea: Case Report. *J Obstet Gynaecol Can*. 2014 Sep;36(9):822-825
3. Riss L, Bronfen C, Le Roux C, Abu Amara S. The abnormal positions of the small child's foot: the equipment at your disposal. *Arch Pediatr*. 2010;17(6):829-30.

### ***Clinical guidelines (2)***

1. Fishburn S. Pelvic girdle pain: updating current practice. *Pract Midwife*. 2015;18(10):12-5.
2. Task Force on the Low Back Pain Clinical Practice Guidelines. American Osteopathic Association Guidelines for osteopathic manipulative treatment (OMT) for patients with low back pain. *J Am Osteopath Assoc*. 2016;116(8):536-49.

### ***Conference proceedings (2)***

1. Franck CC, Moky H, Kavchak AE. The successful management of foot drop in a postpartum patient with use of pelvic floor and orthopedic manual physical therapy: A case report. *Journal of Women's Health Physical Therapy*. 2017;41(1):48-.
2. Lovos ST. Physical therapy interventions including manual therapy, exercise, and pilates in the management of a patient with pregnancy-related low back pain. 2017:1-.

### ***Unable to retrieve (2)***

1. Patient-Centered Approach to Managing Pregnancy-Related Pelvic Girdle Pain
2. System of therapy

### ***Update (1)***

1. Pennick V, Liddle SD. Interventions for preventing and treating pelvic and back pain in pregnancy. *Cochrane Database Syst Rev*. 2013;Aug1;(8):CD001139.
